# Supplementary material
Source: PubMed Central journal article supplement (PMC4571814)

Supplemental Figures for:  
 Long Term Follow-up of Chemotherapy-induced Ovarian Failure in Young Breast Cancer Patients - The Role of Vascular Toxicity  
 Irit Ben-Aharon et al.

**Figure S1: Changes in ovarian measurements using transvaginal ultrasound equipped with Doppler.** Graphic representation of change in resistance index (RI) and pulsatility index (PI) measurements over time, indicating a decrease in ovarian blood flow following chemotherapy and relative recovery stratified upon tratsuzumab ( $p=0.068$ ).

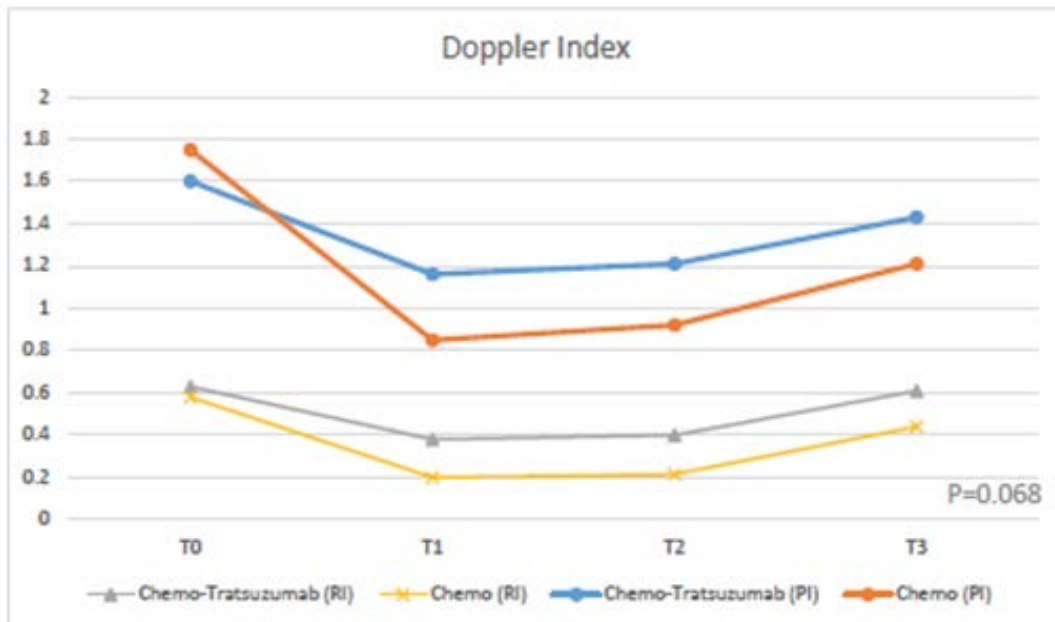

Supplement: supp_the2015-0044_Supplemental_Figure.pdf [file supp_the2015-0044_Supplemental_Figure.pdf]
